# Supplementary material
Source: PubMed Central journal article supplement (PMC5437889)
Supplement: npp2016276x1.pdf [file npp2016276x1.pdf]

# Minimum electric field exposure for seizure induction with electroconvulsive therapy and magnetic seizure therapy

Won Hee Lee, Sarah H. Lisanby, Andrew F. Laine, Angel V. Peterchev

## Supplementary Material

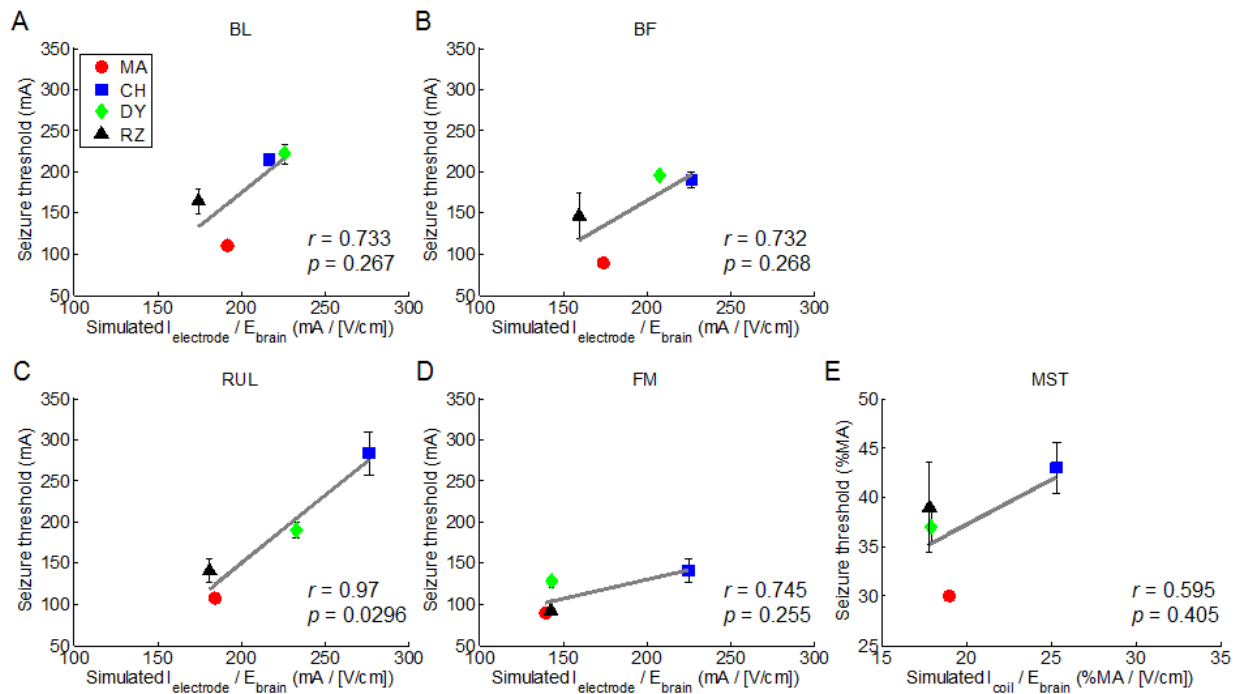

**Figure S1.** Correlation between the average individual amplitude-titrated ST and the  $I/E_{\text{brain}}$  ratio computed from individual E-field simulation models. Plots A–D and E show the results for the four ECT configurations and CAP MST, respectively. The ranges of the axes are matched for the ECT modalities (A–D). Pearson's correlation coefficient  $r$  and significance  $p$  are given separately for each modality as well, indicating that for this small number of subjects the correlations were not significant with the exception of RUL ECT.
